# Supplementary material for: Using Psychometric Testing Procedures for Scale Validity, Reliability, and Invariance Analysis: The PRETIE-Q Portuguese Version
Source: MDPI journal article supplement (doi:10.3390/ejihpe13070086), 2023-06-23
Supplement: s1 [file s1]

## Supplemental Material

### Mplus syntaxes.

USEVARIABLES ARE

pt1 pt2 pt3 pt4 pt5  
pt6 pt7 pt8 pt9 pt10;

Unidimensional (Model 1)

ANALYSIS:

ESTIMATOR IS MLR;

MODEL:

UNI by pt1 pt2 pt3 pt4 pt5  
pt6 pt7 pt8 pt9 pt10;

OUTPUT:

STDYX.

Correlated two-factor CFA (Model 2)

ANALYSIS:

ESTIMATOR IS MLR;

MODEL:

TOL by pt1 pt3 pt8 pt9 pt10;  
PREF by pt2 pt4 pt5 pt6 pt7;

OUTPUT:

STDYX.

Correlated two-factor ESEM (Model 3)

ANALYSIS:

ESTIMATOR IS MLR;

ROTATION IS TARGET (OBLIQUE);

MODEL:

PREF by pt1-pt10  
pt1~0 pt3~0 pt8~0 pt9~0 pt10~0(\*1);  
TOL by pt1-pt10

pt2~0 pt4~0 pt5~0 pt6~0 pt7~0(\*1);

OUTPUT:

STDYX.

One bifactor and two-correlated CFA (Model 4)

ANALYSIS:

ESTIMATOR=MLR;

MODEL:

G by PT1-PT10;

TOL by pt1 pt3 pt8 pt9 pt10;

PREF by pt2 pt4 pt5 pt6 pt7;

OUTPUT:

STDYX.

One bifactor and two-correlated ESEM (Model 5)

ANALYSIS:

ESTIMATOR=MLR;

ROTATION=TARGET (orthogonal);

MODEL:

G by

PT1-PT10 (\*1);

PREF by pt1-pt10

pt1~0 pt3~0 pt8~0 pt9~0 pt10~0(\*1);

TOL by pt1-pt10

pt2~0 pt4~0 pt5~0 pt6~0 pt7~0(\*1);

OUTPUT:

STDYX.
